# Supplementary material for: Structural effects on the photodissociation of alkoxyamines
Source: Royal Society of Chemistry journal article supplement (doi:10.1039/c0ob01207f), 2011-01-01

**A special edition of Organic and Biomolecular Chemistry (OBC)  
commemorating the contributions of Athel Beckwith to free radical  
chemistry.**

**Structural Effects on the Photodissociation of Alkoxyamines**

**Davy-Louis Versace,<sup>a</sup> Yohann Guillaneuf,<sup>b</sup> Denis Bertin,<sup>b</sup> Jean Pierre Fouassier,<sup>a</sup>  
Jacques Lalevée,<sup>\*a</sup> Didier Gigmes<sup>\*b</sup>**

a) Département de Photochimie, CNRS, Université de Haute Alsace, ENSCMu, 3 rue Alfred  
Werner, 68093 Mulhouse Cedex, France.

b) Laboratoire Chimie Provence, Faculté des Sciences et Techniques, Universités Aix-Marseille  
I, II, III-CNRS UMR 6264,  
Equipe CROPS, campus Saint Jérôme Case 542, 13397 Marseille Cedex 20, France

**\*Corresponding authors:** [didier.gigmes@univ-provence.fr](mailto:didier.gigmes@univ-provence.fr)  
[j.lalevee@uha.fr](mailto:j.lalevee@uha.fr)

i/ Optimized Geometry for **4-6**.

ii/ NMR spectra for the new compounds.

### Alkoxyamine 4

|   |    |     |    |     |    |     |
|---|----|-----|----|-----|----|-----|
| C |    |     |    |     |    |     |
| C | 1  | B1  |    |     |    |     |
| C | 1  | B2  | 2  | A1  |    |     |
| H | 1  | B3  | 3  | A2  | 2  | D1  |
| C | 2  | B4  | 1  | A3  | 3  | D2  |
| C | 3  | B5  | 1  | A4  | 2  | D3  |
| C | 2  | B6  | 1  | A5  | 3  | D4  |
| H | 3  | B7  | 1  | A6  | 2  | D5  |
| C | 5  | B8  | 2  | A7  | 1  | D6  |
| C | 6  | B9  | 3  | A8  | 1  | D7  |
| O | 7  | B10 | 2  | A9  | 1  | D8  |
| O | 7  | B11 | 2  | A10 | 1  | D9  |
| H | 5  | B12 | 2  | A11 | 1  | D10 |
| O | 10 | B13 | 6  | A12 | 3  | D11 |
| C | 10 | B14 | 6  | A13 | 3  | D12 |
| C | 12 | B15 | 7  | A14 | 2  | D13 |
| H | 9  | B16 | 5  | A15 | 2  | D14 |
| C | 15 | B17 | 10 | A16 | 6  | D15 |
| C | 15 | B18 | 10 | A17 | 6  | D16 |
| C | 16 | B19 | 12 | A18 | 7  | D17 |
| C | 16 | B20 | 12 | A19 | 7  | D18 |
| H | 16 | B21 | 12 | A20 | 7  | D19 |
| C | 18 | B22 | 15 | A21 | 10 | D20 |
| C | 19 | B23 | 15 | A22 | 10 | D21 |
| C | 20 | B24 | 16 | A23 | 12 | D22 |
| C | 21 | B25 | 16 | A24 | 12 | D23 |
| H | 18 | B26 | 15 | A25 | 10 | D24 |
| H | 19 | B27 | 15 | A26 | 10 | D25 |
| H | 20 | B28 | 16 | A27 | 12 | D26 |
| H | 20 | B29 | 16 | A28 | 12 | D27 |
| H | 21 | B30 | 16 | A29 | 12 | D28 |
| H | 21 | B31 | 16 | A30 | 12 | D29 |
| C | 24 | B32 | 19 | A31 | 15 | D30 |
| N | 25 | B33 | 20 | A32 | 16 | D31 |
| C | 26 | B34 | 21 | A33 | 16 | D32 |
| C | 26 | B35 | 21 | A34 | 16 | D33 |
| C | 25 | B36 | 20 | A35 | 16 | D34 |
| C | 25 | B37 | 20 | A36 | 16 | D35 |
| H | 23 | B38 | 18 | A37 | 15 | D36 |
| H | 24 | B39 | 19 | A38 | 15 | D37 |
| O | 34 | B40 | 25 | A39 | 20 | D38 |
| H | 33 | B41 | 24 | A40 | 19 | D39 |
| H | 35 | B42 | 26 | A41 | 21 | D40 |
| H | 35 | B43 | 26 | A42 | 21 | D41 |
| H | 35 | B44 | 26 | A43 | 21 | D42 |
| H | 36 | B45 | 26 | A44 | 21 | D43 |
| H | 36 | B46 | 26 | A45 | 21 | D44 |
| H | 36 | B47 | 26 | A46 | 21 | D45 |
| H | 37 | B48 | 25 | A47 | 20 | D46 |
| H | 37 | B49 | 25 | A48 | 20 | D47 |

|   |    |     |    |     |    |     |
|---|----|-----|----|-----|----|-----|
| H | 37 | B50 | 25 | A49 | 20 | D48 |
| H | 38 | B51 | 25 | A50 | 20 | D49 |
| H | 38 | B52 | 25 | A51 | 20 | D50 |
| H | 38 | B53 | 25 | A52 | 20 | D51 |
| C | 41 | B54 | 34 | A53 | 25 | D52 |
| C | 55 | B55 | 41 | A54 | 34 | D53 |
| C | 55 | B56 | 41 | A55 | 34 | D54 |
| H | 55 | B57 | 41 | A56 | 34 | D55 |
| C | 57 | B58 | 55 | A57 | 41 | D56 |
| C | 57 | B59 | 55 | A58 | 41 | D57 |
| H | 56 | B60 | 55 | A59 | 41 | D58 |
| H | 56 | B61 | 55 | A60 | 41 | D59 |
| H | 56 | B62 | 55 | A61 | 41 | D60 |
| C | 59 | B63 | 57 | A62 | 55 | D61 |
| C | 60 | B64 | 57 | A63 | 55 | D62 |
| H | 59 | B65 | 57 | A64 | 55 | D63 |
| H | 60 | B66 | 57 | A65 | 55 | D64 |
| C | 64 | B67 | 59 | A66 | 57 | D65 |
| H | 64 | B68 | 59 | A67 | 57 | D66 |
| H | 65 | B69 | 60 | A68 | 57 | D67 |
| H | 68 | B70 | 64 | A69 | 59 | D68 |

|     |            |
|-----|------------|
| B1  | 1.40000140 |
| B2  | 1.39198214 |
| B3  | 1.08488274 |
| B4  | 1.40308956 |
| B5  | 1.40398575 |
| B6  | 1.49428753 |
| B7  | 1.08505360 |
| B8  | 1.38958503 |
| B9  | 1.50384603 |
| B10 | 1.21669715 |
| B11 | 1.35019651 |
| B12 | 1.08400243 |
| B13 | 1.22587486 |
| B14 | 1.49914103 |
| B15 | 1.45552672 |
| B16 | 1.08502124 |
| B17 | 1.40457177 |
| B18 | 1.40369403 |
| B19 | 1.51755045 |
| B20 | 1.52093211 |
| B21 | 1.09159720 |
| B22 | 1.39116881 |
| B23 | 1.39528475 |
| B24 | 1.54673229 |
| B25 | 1.54629787 |
| B26 | 1.08519473 |
| B27 | 1.08523752 |
| B28 | 1.09596589 |
| B29 | 1.09724846 |
| B30 | 1.09494387 |
| B31 | 1.09740999 |

|     |              |
|-----|--------------|
| B32 | 1.39560354   |
| B33 | 1.50242061   |
| B34 | 1.54678332   |
| B35 | 1.54187348   |
| B36 | 1.54706405   |
| B37 | 1.53901895   |
| B38 | 1.08658206   |
| B39 | 1.08652607   |
| B40 | 1.44974482   |
| B41 | 1.08678378   |
| B42 | 1.09187308   |
| B43 | 1.09590494   |
| B44 | 1.09250619   |
| B45 | 1.09243080   |
| B46 | 1.09592642   |
| B47 | 1.09473568   |
| B48 | 1.09211141   |
| B49 | 1.09249765   |
| B50 | 1.09609603   |
| B51 | 1.09639763   |
| B52 | 1.09058007   |
| B53 | 1.09403800   |
| B54 | 1.44891401   |
| B55 | 1.53250761   |
| B56 | 1.52072915   |
| B57 | 1.09271815   |
| B58 | 1.39840047   |
| B59 | 1.40258085   |
| B60 | 1.09503340   |
| B61 | 1.09504479   |
| B62 | 1.09400201   |
| B63 | 1.39725682   |
| B64 | 1.39390116   |
| B65 | 1.08799235   |
| B66 | 1.08703206   |
| B67 | 1.39456519   |
| B68 | 1.08696263   |
| B69 | 1.08704278   |
| B70 | 1.08676788   |
| A1  | 120.25504845 |
| A2  | 121.06447004 |
| A3  | 119.66390301 |
| A4  | 120.33998199 |
| A5  | 117.82374632 |
| A6  | 119.58543249 |
| A7  | 119.95943279 |
| A8  | 123.04537472 |
| A9  | 123.80008232 |
| A10 | 112.20758057 |
| A11 | 119.57637325 |
| A12 | 119.30459692 |
| A13 | 120.68409031 |
| A14 | 117.20454904 |

|     |              |
|-----|--------------|
| A15 | 120.80485396 |
| A16 | 117.67233234 |
| A17 | 123.10266162 |
| A18 | 106.75401045 |
| A19 | 110.05333560 |
| A20 | 107.17296175 |
| A21 | 120.48469090 |
| A22 | 120.29892309 |
| A23 | 113.14183988 |
| A24 | 112.97742854 |
| A25 | 118.43382025 |
| A26 | 120.03646472 |
| A27 | 110.42687553 |
| A28 | 108.20665070 |
| A29 | 110.21582996 |
| A30 | 107.88726877 |
| A31 | 120.09814129 |
| A32 | 107.68390876 |
| A33 | 111.07829079 |
| A34 | 106.49367801 |
| A35 | 111.06647879 |
| A36 | 106.69941983 |
| A37 | 119.92175816 |
| A38 | 119.75287457 |
| A39 | 107.54448647 |
| A40 | 120.00589309 |
| A41 | 113.30695279 |
| A42 | 109.52690009 |
| A43 | 110.02685427 |
| A44 | 111.84102575 |
| A45 | 109.53522277 |
| A46 | 110.81135088 |
| A47 | 113.52300853 |
| A48 | 110.03346464 |
| A49 | 109.39484598 |
| A50 | 109.47734221 |
| A51 | 111.70799402 |
| A52 | 110.72481690 |
| A53 | 113.65470004 |
| A54 | 105.90327682 |
| A55 | 113.43522212 |
| A56 | 108.02898314 |
| A57 | 120.37120315 |
| A58 | 120.99078412 |
| A59 | 110.28166748 |
| A60 | 110.52549488 |
| A61 | 111.11536758 |
| A62 | 120.89575454 |
| A63 | 120.71803681 |
| A64 | 119.39690621 |
| A65 | 119.48326753 |
| A66 | 120.01482048 |
| A67 | 119.82722152 |

|     |               |
|-----|---------------|
| A68 | 119.81385880  |
| A69 | 120.23509243  |
| D1  | 179.84941139  |
| D2  | 0.89321362    |
| D3  | -0.48301977   |
| D4  | -179.38346457 |
| D5  | -178.96486030 |
| D6  | -0.05105300   |
| D7  | -176.60479766 |
| D8  | 1.22486858    |
| D9  | -178.60468224 |
| D10 | 179.63339027  |
| D11 | 148.33567514  |
| D12 | -31.52818733  |
| D13 | 179.45217167  |
| D14 | 178.63431686  |
| D15 | 155.22271799  |
| D16 | -28.48924089  |
| D17 | -154.77144872 |
| D18 | 86.47939222   |
| D19 | -34.41391185  |
| D20 | 178.03836953  |
| D21 | -176.92047193 |
| D22 | -176.48271935 |
| D23 | 174.26136274  |
| D24 | -1.93147563   |
| D25 | 1.44263387    |
| D26 | 61.58604711   |
| D27 | -55.54715124  |
| D28 | -64.01614503  |
| D29 | 53.41277277   |
| D30 | -0.58511411   |
| D31 | 53.31104269   |
| D32 | 74.01118221   |
| D33 | -168.75312293 |
| D34 | -73.51283824  |
| D35 | 169.13482261  |
| D36 | 179.11394102  |
| D37 | 179.24426014  |
| D38 | -174.68891487 |
| D39 | -179.44668232 |
| D40 | -47.84123167  |
| D41 | 71.65133129   |
| D42 | -169.44078155 |
| D43 | -172.90394509 |
| D44 | -53.97870589  |
| D45 | 65.37303236   |
| D46 | 49.44615696   |
| D47 | 170.99972366  |
| D48 | -70.39947035  |
| D49 | 52.06839996   |
| D50 | 171.61378307  |
| D51 | -67.57409385  |

|     |               |
|-----|---------------|
| D52 | -125.20161196 |
| D53 | -142.35120552 |
| D54 | 96.04689644   |
| D55 | -24.40405737  |
| D56 | -126.32921436 |
| D57 | 56.09386133   |
| D58 | -179.03436740 |
| D59 | -59.73785052  |
| D60 | 60.23384475   |
| D61 | -177.70734975 |
| D62 | 178.04236393  |
| D63 | 2.39792363    |
| D64 | -2.93700911   |
| D65 | -0.21823523   |
| D66 | -179.93714240 |
| D67 | 179.63605646  |
| D68 | -179.82285643 |

### Alkoxyamine 5

|   |    |     |    |            |
|---|----|-----|----|------------|
| C |    |     |    |            |
| C | 1  | B1  |    |            |
| C | 1  | B2  | 2  | A1         |
| H | 1  | B3  | 2  | A2 3 D1    |
| C | 2  | B4  | 1  | A3 3 D2    |
| C | 3  | B5  | 1  | A4 2 D3    |
| H | 2  | B6  | 1  | A5 3 D4    |
| H | 3  | B7  | 1  | A6 2 D5    |
| C | 5  | B8  | 2  | A7 1 D6    |
| C | 6  | B9  | 3  | A8 1 D7    |
| H | 5  | B10 | 2  | A9 1 D8    |
| O | 10 | B11 | 6  | A10 3 D9   |
| C | 10 | B12 | 6  | A11 3 D10  |
| H | 9  | B13 | 5  | A12 2 D11  |
| C | 13 | B14 | 10 | A13 6 D12  |
| C | 13 | B15 | 10 | A14 6 D13  |
| C | 15 | B16 | 13 | A15 10 D14 |
| C | 16 | B17 | 13 | A16 10 D15 |
| H | 15 | B18 | 13 | A17 10 D16 |
| H | 16 | B19 | 13 | A18 10 D17 |
| C | 17 | B20 | 15 | A19 13 D18 |
| H | 17 | B21 | 15 | A20 13 D19 |
| H | 18 | B22 | 16 | A21 13 D20 |
| N | 21 | B23 | 17 | A22 15 D21 |
| C | 24 | B24 | 21 | A23 17 D22 |
| H | 24 | B25 | 21 | A24 17 D23 |
| O | 25 | B26 | 24 | A25 21 D24 |
| C | 25 | B27 | 24 | A26 21 D25 |
| C | 28 | B28 | 25 | A27 24 D26 |
| O | 28 | B29 | 25 | A28 24 D27 |
| H | 28 | B30 | 25 | A29 24 D28 |

|   |    |     |    |     |    |     |
|---|----|-----|----|-----|----|-----|
| C | 29 | B31 | 28 | A30 | 25 | D29 |
| N | 30 | B32 | 28 | A31 | 25 | D30 |
| H | 29 | B33 | 28 | A32 | 25 | D31 |
| H | 29 | B34 | 28 | A33 | 25 | D32 |
| C | 32 | B35 | 29 | A34 | 28 | D33 |
| C | 32 | B36 | 29 | A35 | 28 | D34 |
| C | 32 | B37 | 29 | A36 | 28 | D35 |
| C | 33 | B38 | 30 | A37 | 28 | D36 |
| C | 33 | B39 | 30 | A38 | 28 | D37 |
| O | 38 | B40 | 32 | A39 | 29 | D38 |
| O | 38 | B41 | 32 | A40 | 29 | D39 |
| C | 39 | B42 | 33 | A41 | 30 | D40 |
| C | 39 | B43 | 33 | A42 | 30 | D41 |
| C | 39 | B44 | 33 | A43 | 30 | D42 |
| P | 40 | B45 | 33 | A44 | 30 | D43 |
| C | 40 | B46 | 33 | A45 | 30 | D44 |
| H | 36 | B47 | 32 | A46 | 29 | D45 |
| H | 36 | B48 | 32 | A47 | 29 | D46 |
| H | 36 | B49 | 32 | A48 | 29 | D47 |
| H | 37 | B50 | 32 | A49 | 29 | D48 |
| H | 37 | B51 | 32 | A50 | 29 | D49 |
| H | 37 | B52 | 32 | A51 | 29 | D50 |
| H | 40 | B53 | 33 | A52 | 30 | D51 |
| C | 47 | B54 | 40 | A53 | 33 | D52 |
| C | 47 | B55 | 40 | A54 | 33 | D53 |
| C | 47 | B56 | 40 | A55 | 33 | D54 |
| O | 46 | B57 | 40 | A56 | 33 | D55 |
| O | 46 | B58 | 40 | A57 | 33 | D56 |
| O | 46 | B59 | 40 | A58 | 33 | D57 |
| H | 42 | B60 | 38 | A59 | 32 | D58 |
| H | 43 | B61 | 39 | A60 | 33 | D59 |
| H | 43 | B62 | 39 | A61 | 33 | D60 |
| H | 43 | B63 | 39 | A62 | 33 | D61 |
| H | 44 | B64 | 39 | A63 | 33 | D62 |
| H | 44 | B65 | 39 | A64 | 33 | D63 |
| H | 44 | B66 | 39 | A65 | 33 | D64 |
| H | 45 | B67 | 39 | A66 | 33 | D65 |
| H | 45 | B68 | 39 | A67 | 33 | D66 |
| H | 45 | B69 | 39 | A68 | 33 | D67 |
| C | 59 | B70 | 46 | A69 | 40 | D68 |
| C | 60 | B71 | 46 | A70 | 40 | D69 |
| H | 55 | B72 | 47 | A71 | 40 | D70 |
| H | 55 | B73 | 47 | A72 | 40 | D71 |
| H | 55 | B74 | 47 | A73 | 40 | D72 |
| H | 56 | B75 | 47 | A74 | 40 | D73 |
| H | 56 | B76 | 47 | A75 | 40 | D74 |
| H | 56 | B77 | 47 | A76 | 40 | D75 |
| H | 57 | B78 | 47 | A77 | 40 | D76 |
| H | 57 | B79 | 47 | A78 | 40 | D77 |
| H | 57 | B80 | 47 | A79 | 40 | D78 |
| C | 71 | B81 | 59 | A80 | 46 | D79 |
| C | 72 | B82 | 60 | A81 | 46 | D80 |
| H | 71 | B83 | 59 | A82 | 46 | D81 |



|   |    |     |    |     |    |     |
|---|----|-----|----|-----|----|-----|
| H | 71 | B84 | 59 | A83 | 46 | D82 |
| H | 72 | B85 | 60 | A84 | 46 | D83 |
| H | 72 | B86 | 60 | A85 | 46 | D84 |
| H | 82 | B87 | 71 | A86 | 59 | D85 |
| H | 82 | B88 | 71 | A87 | 59 | D86 |
| H | 82 | B89 | 71 | A88 | 59 | D87 |
| H | 83 | B90 | 72 | A89 | 60 | D88 |
| H | 83 | B91 | 72 | A90 | 60 | D89 |
| H | 83 | B92 | 72 | A91 | 60 | D90 |

|     |            |
|-----|------------|
| B1  | 1.39556691 |
| B2  | 1.39558200 |
| B3  | 1.08666969 |
| B4  | 1.39822070 |
| B5  | 1.40329633 |
| B6  | 1.08680134 |
| B7  | 1.08550295 |
| B8  | 1.39160315 |
| B9  | 1.50182232 |
| B10 | 1.08665503 |
| B11 | 1.22739230 |
| B12 | 1.49593932 |
| B13 | 1.08526456 |
| B14 | 1.40341711 |
| B15 | 1.40372910 |
| B16 | 1.38913865 |
| B17 | 1.38903820 |
| B18 | 1.08519033 |
| B19 | 1.08491904 |
| B20 | 1.40518753 |
| B21 | 1.08086414 |
| B22 | 1.08782762 |
| B23 | 1.40945433 |
| B24 | 1.38887868 |
| B25 | 1.01607876 |
| B26 | 1.22801574 |
| B27 | 1.53575935 |
| B28 | 1.54335662 |
| B29 | 1.44148517 |
| B30 | 1.08848120 |
| B31 | 1.55528618 |
| B32 | 1.45421538 |
| B33 | 1.09198509 |
| B34 | 1.09607622 |
| B35 | 1.55280138 |
| B36 | 1.53811969 |
| B37 | 1.53138257 |
| B38 | 1.49782190 |
| B39 | 1.48325004 |
| B40 | 1.20955520 |
| B41 | 1.36113607 |
| B42 | 1.53734867 |
| B43 | 1.54556042 |

|     |              |
|-----|--------------|
| B44 | 1.54356090   |
| B45 | 1.88420902   |
| B46 | 1.59448426   |
| B47 | 1.09495774   |
| B48 | 1.09485441   |
| B49 | 1.09583093   |
| B50 | 1.09281277   |
| B51 | 1.09579217   |
| B52 | 1.09331664   |
| B53 | 1.09448489   |
| B54 | 1.55021047   |
| B55 | 1.54218121   |
| B56 | 1.54200436   |
| B57 | 1.48905691   |
| B58 | 1.62188383   |
| B59 | 1.62352512   |
| B60 | 0.97590620   |
| B61 | 1.09561211   |
| B62 | 1.08844801   |
| B63 | 1.09188177   |
| B64 | 1.09562030   |
| B65 | 1.09436690   |
| B66 | 1.09320643   |
| B67 | 1.09616454   |
| B68 | 1.09321200   |
| B69 | 1.09125604   |
| B70 | 1.45632601   |
| B71 | 1.44920166   |
| B72 | 1.09651742   |
| B73 | 1.09508854   |
| B74 | 1.09287372   |
| B75 | 1.09693879   |
| B76 | 1.09130840   |
| B77 | 1.09187997   |
| B78 | 1.09681059   |
| B79 | 1.09191674   |
| B80 | 1.09342651   |
| B81 | 1.51748312   |
| B82 | 1.51751692   |
| B83 | 1.09325809   |
| B84 | 1.09295497   |
| B85 | 1.09507196   |
| B86 | 1.09585645   |
| B87 | 1.09588050   |
| B88 | 1.09524629   |
| B89 | 1.09535190   |
| B90 | 1.09586708   |
| B91 | 1.09474878   |
| B92 | 1.09469803   |
| A1  | 120.10212292 |
| A2  | 120.12403353 |
| A3  | 119.90622772 |
| A4  | 120.35749339 |

|     |              |
|-----|--------------|
| A5  | 120.03306604 |
| A6  | 119.66894663 |
| A7  | 120.03336635 |
| A8  | 123.14426285 |
| A9  | 120.05992883 |
| A10 | 119.45118436 |
| A11 | 120.68211713 |
| A12 | 121.02477606 |
| A13 | 118.06498248 |
| A14 | 123.84515843 |
| A15 | 121.88808313 |
| A16 | 120.68906111 |
| A17 | 118.18294237 |
| A18 | 120.26201668 |
| A19 | 119.83350522 |
| A20 | 119.87635311 |
| A21 | 119.54268485 |
| A22 | 125.03854160 |
| A23 | 135.85874309 |
| A24 | 113.20081095 |
| A25 | 117.52076609 |
| A26 | 124.11016117 |
| A27 | 113.84450375 |
| A28 | 113.73208817 |
| A29 | 103.29290374 |
| A30 | 116.96407738 |
| A31 | 110.92404484 |
| A32 | 110.80072199 |
| A33 | 105.74666046 |
| A34 | 107.12333622 |
| A35 | 112.73252567 |
| A36 | 113.43511994 |
| A37 | 108.36022494 |
| A38 | 109.23110246 |
| A39 | 125.39140687 |
| A40 | 112.69916660 |
| A41 | 109.60464006 |
| A42 | 107.26421880 |
| A43 | 114.33162388 |
| A44 | 110.54080164 |
| A45 | 125.17385609 |
| A46 | 110.63487528 |
| A47 | 111.40726652 |
| A48 | 109.75742322 |
| A49 | 110.28129719 |
| A50 | 110.16274991 |
| A51 | 111.68100264 |
| A52 | 101.08143938 |
| A53 | 107.59716470 |
| A54 | 117.17453006 |
| A55 | 108.85072899 |
| A56 | 112.32238614 |
| A57 | 108.67885177 |

|     |               |
|-----|---------------|
| A58 | 104.90224361  |
| A59 | 105.62944545  |
| A60 | 108.13746629  |
| A61 | 113.25579527  |
| A62 | 110.90856855  |
| A63 | 109.55322403  |
| A64 | 110.57456433  |
| A65 | 112.02005978  |
| A66 | 109.47669998  |
| A67 | 110.66874584  |
| A68 | 112.65717913  |
| A69 | 120.82705035  |
| A70 | 118.40591478  |
| A71 | 108.89430080  |
| A72 | 111.90952837  |
| A73 | 112.65413068  |
| A74 | 108.52070250  |
| A75 | 111.88678568  |
| A76 | 112.96012267  |
| A77 | 109.33686331  |
| A78 | 112.65800675  |
| A79 | 111.40936747  |
| A80 | 107.62675188  |
| A81 | 108.14055526  |
| A82 | 108.76123145  |
| A83 | 108.74051714  |
| A84 | 108.84941331  |
| A85 | 108.44666107  |
| A86 | 109.64777381  |
| A87 | 111.08827377  |
| A88 | 111.08596692  |
| A89 | 109.87289329  |
| A90 | 110.82054377  |
| A91 | 110.82381543  |
| D1  | -179.76972839 |
| D2  | 1.00588616    |
| D3  | -0.62111607   |
| D4  | -179.44540431 |
| D5  | -178.84266753 |
| D6  | -0.02734887   |
| D7  | -176.65109261 |
| D8  | 179.53629893  |
| D9  | 147.53862052  |
| D10 | -32.69406885  |
| D11 | 178.55537851  |
| D12 | 158.74533242  |
| D13 | -26.03337910  |
| D14 | 177.45691436  |
| D15 | -176.92731253 |
| D16 | -1.44914812   |
| D17 | 1.70099789    |
| D18 | -0.22195412   |
| D19 | -177.40126821 |

|     |               |
|-----|---------------|
| D20 | 179.79924971  |
| D21 | -179.87706651 |
| D22 | -31.95292939  |
| D23 | 172.50013338  |
| D24 | -155.63409175 |
| D25 | 25.75965970   |
| D26 | -76.85287235  |
| D27 | 48.30136817   |
| D28 | 164.31154390  |
| D29 | -69.24521746  |
| D30 | 86.62121655   |
| D31 | 56.41947758   |
| D32 | 171.50583348  |
| D33 | -172.48954196 |
| D34 | -52.13106842  |
| D35 | 71.58906721   |
| D36 | 110.84086900  |
| D37 | -105.92164534 |
| D38 | -148.64446668 |
| D39 | 35.52129923   |
| D40 | 176.24886504  |
| D41 | -68.31541831  |
| D42 | 51.19708458   |
| D43 | 136.55418746  |
| D44 | -78.46780359  |
| D45 | -177.63886251 |
| D46 | -56.88823435  |
| D47 | 63.11286601   |
| D48 | -172.41358926 |
| D49 | -52.57982832  |
| D50 | 68.52341488   |
| D51 | 35.08079949   |
| D52 | 166.75691452  |
| D53 | -72.59907775  |
| D54 | 51.28501862   |
| D55 | -133.26328562 |
| D56 | -6.78580114   |
| D57 | 100.47012900  |
| D58 | 177.12952666  |
| D59 | 178.31320758  |
| D60 | -62.44017817  |
| D61 | 59.71994287   |
| D62 | -173.73685518 |
| D63 | -54.53122455  |
| D64 | 67.33706381   |
| D65 | -171.63424366 |
| D66 | -52.71137785  |
| D67 | 68.83740334   |
| D68 | -107.25497376 |
| D69 | 177.99703374  |
| D70 | -170.50721101 |
| D71 | -51.24173398  |
| D72 | 70.00028775   |

|     |               |
|-----|---------------|
| D73 | -174.98770436 |
| D74 | -56.07500411  |
| D75 | 66.84922698   |
| D76 | 179.75647865  |
| D77 | -60.34928088  |
| D78 | 61.05577619   |
| D79 | -161.52078537 |
| D80 | -173.93084745 |
| D81 | -40.33454941  |
| D82 | 77.33253428   |
| D83 | -52.66848700  |
| D84 | 65.26562997   |
| D85 | -179.58567112 |
| D86 | -60.00795718  |
| D87 | 60.61255101   |
| D88 | -179.11954951 |
| D89 | -59.35226216  |
| D90 | 61.16677825   |

### Alkoxyamine 6

|   |    |     |    |     |    |     |
|---|----|-----|----|-----|----|-----|
| C |    |     |    |     |    |     |
| C | 1  | B1  |    |     |    |     |
| C | 1  | B2  | 2  | A1  |    |     |
| H | 1  | B3  | 3  | A2  | 2  | D1  |
| C | 2  | B4  | 1  | A3  | 3  | D2  |
| C | 3  | B5  | 1  | A4  | 2  | D3  |
| H | 2  | B6  | 1  | A5  | 3  | D4  |
| H | 3  | B7  | 1  | A6  | 2  | D5  |
| C | 5  | B8  | 2  | A7  | 1  | D6  |
| C | 6  | B9  | 3  | A8  | 1  | D7  |
| H | 5  | B10 | 2  | A9  | 1  | D8  |
| O | 10 | B11 | 6  | A10 | 3  | D9  |
| C | 10 | B12 | 6  | A11 | 3  | D10 |
| H | 9  | B13 | 5  | A12 | 2  | D11 |
| C | 13 | B14 | 10 | A13 | 6  | D12 |
| C | 13 | B15 | 10 | A14 | 6  | D13 |
| C | 15 | B16 | 13 | A15 | 10 | D14 |
| C | 16 | B17 | 13 | A16 | 10 | D15 |
| H | 15 | B18 | 13 | A17 | 10 | D16 |
| H | 16 | B19 | 13 | A18 | 10 | D17 |
| C | 18 | B20 | 16 | A19 | 13 | D18 |
| H | 17 | B21 | 15 | A20 | 13 | D19 |
| H | 18 | B22 | 16 | A21 | 13 | D20 |
| O | 21 | B23 | 18 | A22 | 16 | D21 |
| C | 24 | B24 | 21 | A23 | 18 | D22 |
| O | 25 | B25 | 24 | A24 | 21 | D23 |
| C | 25 | B26 | 24 | A25 | 21 | D24 |
| C | 27 | B27 | 25 | A26 | 24 | D25 |
| O | 27 | B28 | 25 | A27 | 24 | D26 |
| H | 27 | B29 | 25 | A28 | 24 | D27 |
| C | 28 | B30 | 27 | A29 | 25 | D28 |

|   |    |     |    |     |    |     |
|---|----|-----|----|-----|----|-----|
| N | 29 | B31 | 27 | A30 | 25 | D29 |
| H | 28 | B32 | 27 | A31 | 25 | D30 |
| H | 28 | B33 | 27 | A32 | 25 | D31 |
| C | 31 | B34 | 28 | A33 | 27 | D32 |
| C | 31 | B35 | 28 | A34 | 27 | D33 |
| C | 31 | B36 | 28 | A35 | 27 | D34 |
| C | 32 | B37 | 29 | A36 | 27 | D35 |
| C | 32 | B38 | 29 | A37 | 27 | D36 |
| O | 37 | B39 | 31 | A38 | 28 | D37 |
| O | 37 | B40 | 31 | A39 | 28 | D38 |
| C | 38 | B41 | 32 | A40 | 29 | D39 |
| C | 38 | B42 | 32 | A41 | 29 | D40 |
| C | 38 | B43 | 32 | A42 | 29 | D41 |
| P | 39 | B44 | 32 | A43 | 29 | D42 |
| C | 39 | B45 | 32 | A44 | 29 | D43 |
| H | 35 | B46 | 31 | A45 | 28 | D44 |
| H | 35 | B47 | 31 | A46 | 28 | D45 |
| H | 35 | B48 | 31 | A47 | 28 | D46 |
| H | 36 | B49 | 31 | A48 | 28 | D47 |
| H | 36 | B50 | 31 | A49 | 28 | D48 |
| H | 36 | B51 | 31 | A50 | 28 | D49 |
| H | 39 | B52 | 32 | A51 | 29 | D50 |
| C | 46 | B53 | 39 | A52 | 32 | D51 |
| C | 46 | B54 | 39 | A53 | 32 | D52 |
| C | 46 | B55 | 39 | A54 | 32 | D53 |
| O | 45 | B56 | 39 | A55 | 32 | D54 |
| O | 45 | B57 | 39 | A56 | 32 | D55 |
| O | 45 | B58 | 39 | A57 | 32 | D56 |
| H | 41 | B59 | 37 | A58 | 31 | D57 |
| H | 42 | B60 | 38 | A59 | 32 | D58 |
| H | 42 | B61 | 38 | A60 | 32 | D59 |
| H | 42 | B62 | 38 | A61 | 32 | D60 |
| H | 43 | B63 | 38 | A62 | 32 | D61 |
| H | 43 | B64 | 38 | A63 | 32 | D62 |
| H | 43 | B65 | 38 | A64 | 32 | D63 |
| H | 44 | B66 | 38 | A65 | 32 | D64 |
| H | 44 | B67 | 38 | A66 | 32 | D65 |
| H | 44 | B68 | 38 | A67 | 32 | D66 |
| C | 58 | B69 | 45 | A68 | 39 | D67 |
| C | 59 | B70 | 45 | A69 | 39 | D68 |
| H | 54 | B71 | 46 | A70 | 39 | D69 |
| H | 54 | B72 | 46 | A71 | 39 | D70 |
| H | 54 | B73 | 46 | A72 | 39 | D71 |
| H | 55 | B74 | 46 | A73 | 39 | D72 |
| H | 55 | B75 | 46 | A74 | 39 | D73 |
| H | 55 | B76 | 46 | A75 | 39 | D74 |
| H | 56 | B77 | 46 | A76 | 39 | D75 |
| H | 56 | B78 | 46 | A77 | 39 | D76 |
| H | 56 | B79 | 46 | A78 | 39 | D77 |
| C | 70 | B80 | 58 | A79 | 45 | D78 |
| C | 71 | B81 | 59 | A80 | 45 | D79 |
| H | 70 | B82 | 58 | A81 | 45 | D80 |
| H | 70 | B83 | 58 | A82 | 45 | D81 |

|   |    |     |    |     |    |     |
|---|----|-----|----|-----|----|-----|
| H | 71 | B84 | 59 | A83 | 45 | D82 |
| H | 71 | B85 | 59 | A84 | 45 | D83 |
| H | 81 | B86 | 70 | A85 | 58 | D84 |
| H | 81 | B87 | 70 | A86 | 58 | D85 |
| H | 81 | B88 | 70 | A87 | 58 | D86 |
| H | 82 | B89 | 71 | A88 | 59 | D87 |
| H | 82 | B90 | 71 | A89 | 59 | D88 |
| H | 82 | B91 | 71 | A90 | 59 | D89 |

|     |            |
|-----|------------|
| B1  | 1.39547682 |
| B2  | 1.39546500 |
| B3  | 1.08655342 |
| B4  | 1.39842474 |
| B5  | 1.40352627 |
| B6  | 1.08685449 |
| B7  | 1.08522780 |
| B8  | 1.39131133 |
| B9  | 1.50038094 |
| B10 | 1.08667215 |
| B11 | 1.22686205 |
| B12 | 1.50007348 |
| B13 | 1.08522197 |
| B14 | 1.40442070 |
| B15 | 1.40368850 |
| B16 | 1.38992668 |
| B17 | 1.39529040 |
| B18 | 1.08505060 |
| B19 | 1.08484300 |
| B20 | 1.39209382 |
| B21 | 1.08500547 |
| B22 | 1.08677407 |
| B23 | 1.40302429 |
| B24 | 1.36299139 |
| B25 | 1.20818698 |
| B26 | 1.53354107 |
| B27 | 1.54360102 |
| B28 | 1.43022750 |
| B29 | 1.09096098 |
| B30 | 1.55345769 |
| B31 | 1.45182433 |
| B32 | 1.09362034 |
| B33 | 1.09620114 |
| B34 | 1.55138167 |
| B35 | 1.53812135 |
| B36 | 1.53114277 |
| B37 | 1.50069205 |
| B38 | 1.48501026 |
| B39 | 1.20908996 |
| B40 | 1.36139303 |
| B41 | 1.53731006 |
| B42 | 1.54526861 |
| B43 | 1.54421000 |
| B44 | 1.87806016 |



|     |              |
|-----|--------------|
| B45 | 1.59103623   |
| B46 | 1.09527814   |
| B47 | 1.09430533   |
| B48 | 1.09594829   |
| B49 | 1.09288716   |
| B50 | 1.09592911   |
| B51 | 1.09357238   |
| B52 | 1.09174658   |
| B53 | 1.55044807   |
| B54 | 1.54132946   |
| B55 | 1.54520747   |
| B56 | 1.49338447   |
| B57 | 1.62200089   |
| B58 | 1.61839626   |
| B59 | 0.97616847   |
| B60 | 1.09553541   |
| B61 | 1.09008218   |
| B62 | 1.09148595   |
| B63 | 1.09564389   |
| B64 | 1.09445980   |
| B65 | 1.09420486   |
| B66 | 1.09615133   |
| B67 | 1.09265808   |
| B68 | 1.09099349   |
| B69 | 1.45367595   |
| B70 | 1.45119138   |
| B71 | 1.09623334   |
| B72 | 1.09507688   |
| B73 | 1.09322416   |
| B74 | 1.09705597   |
| B75 | 1.09201061   |
| B76 | 1.09182583   |
| B77 | 1.09698475   |
| B78 | 1.09118150   |
| B79 | 1.09440538   |
| B80 | 1.51740694   |
| B81 | 1.51722338   |
| B82 | 1.09319924   |
| B83 | 1.09322956   |
| B84 | 1.09499873   |
| B85 | 1.09538319   |
| B86 | 1.09577781   |
| B87 | 1.09509532   |
| B88 | 1.09514706   |
| B89 | 1.09580447   |
| B90 | 1.09474254   |
| B91 | 1.09455868   |
| A1  | 120.10982714 |
| A2  | 119.73106439 |
| A3  | 119.94613456 |
| A4  | 120.30122822 |
| A5  | 120.01764578 |
| A6  | 119.64224692 |

|     |              |
|-----|--------------|
| A7  | 120.01016083 |
| A8  | 123.09494063 |
| A9  | 120.06098646 |
| A10 | 119.70157166 |
| A11 | 120.68482405 |
| A12 | 121.08119182 |
| A13 | 117.60617440 |
| A14 | 123.34172182 |
| A15 | 120.65073089 |
| A16 | 121.13883458 |
| A17 | 118.57543904 |
| A18 | 120.11323289 |
| A19 | 118.33895232 |
| A20 | 121.67350031 |
| A21 | 120.62425823 |
| A22 | 120.94264602 |
| A23 | 118.94645102 |
| A24 | 124.39896919 |
| A25 | 111.83208889 |
| A26 | 111.39390578 |
| A27 | 113.57988262 |
| A28 | 105.69659523 |
| A29 | 117.91829904 |
| A30 | 111.85942176 |
| A31 | 108.74395224 |
| A32 | 105.61945154 |
| A33 | 107.33939264 |
| A34 | 111.98755452 |
| A35 | 113.07281874 |
| A36 | 107.64240535 |
| A37 | 107.74842551 |
| A38 | 125.61815729 |
| A39 | 112.32965330 |
| A40 | 109.82144039 |
| A41 | 106.70543339 |
| A42 | 114.54795453 |
| A43 | 110.19470123 |
| A44 | 125.35939212 |
| A45 | 110.72264517 |
| A46 | 111.42397613 |
| A47 | 109.78171837 |
| A48 | 110.46178030 |
| A49 | 110.00070342 |
| A50 | 112.02287336 |
| A51 | 100.58576936 |
| A52 | 107.37568433 |
| A53 | 117.14632365 |
| A54 | 108.41606027 |
| A55 | 111.59038959 |
| A56 | 109.53276681 |
| A57 | 105.50483908 |
| A58 | 105.97689057 |
| A59 | 108.22423996 |

|     |               |
|-----|---------------|
| A60 | 113.04224908  |
| A61 | 111.09670172  |
| A62 | 109.75397755  |
| A63 | 110.66142921  |
| A64 | 111.76956004  |
| A65 | 109.23749642  |
| A66 | 110.78761827  |
| A67 | 112.76839409  |
| A68 | 121.18719192  |
| A69 | 118.79854126  |
| A70 | 108.94250668  |
| A71 | 111.98527669  |
| A72 | 112.51431487  |
| A73 | 108.70466851  |
| A74 | 111.72307085  |
| A75 | 113.12330297  |
| A76 | 109.18975057  |
| A77 | 112.55614020  |
| A78 | 111.29376658  |
| A79 | 107.76317379  |
| A80 | 108.10490864  |
| A81 | 108.78588471  |
| A82 | 108.72104553  |
| A83 | 108.82180646  |
| A84 | 108.25336116  |
| A85 | 109.67043484  |
| A86 | 111.02385309  |
| A87 | 111.01330296  |
| A88 | 109.82737207  |
| A89 | 110.81152831  |
| A90 | 110.81181693  |
| D1  | 179.87706436  |
| D2  | 0.95996719    |
| D3  | -0.61282111   |
| D4  | -179.42708765 |
| D5  | -179.01759135 |
| D6  | -0.00752986   |
| D7  | -176.66069487 |
| D8  | 179.59170167  |
| D9  | 149.82401106  |
| D10 | -30.04134374  |
| D11 | 178.61092280  |
| D12 | 154.77514277  |
| D13 | -29.38147268  |
| D14 | 178.00689257  |
| D15 | -176.81199234 |
| D16 | -1.76648147   |
| D17 | 1.36187755    |
| D18 | -0.62834441   |
| D19 | 179.26323775  |
| D20 | 178.44329756  |
| D21 | 177.08926011  |
| D22 | 70.88659228   |

|     |               |
|-----|---------------|
| D23 | -2.78530898   |
| D24 | 174.95126332  |
| D25 | -72.37934825  |
| D26 | 46.21895724   |
| D27 | 166.42905116  |
| D28 | -76.19202394  |
| D29 | 77.03325056   |
| D30 | 49.92396769   |
| D31 | 164.26167508  |
| D32 | -179.55186756 |
| D33 | -59.58540715  |
| D34 | 63.52406056   |
| D35 | 112.90721882  |
| D36 | -106.96323743 |
| D37 | -139.89669309 |
| D38 | 43.11894756   |
| D39 | 173.08820002  |
| D40 | -70.84070592  |
| D41 | 48.14269780   |
| D42 | 140.06206663  |
| D43 | -73.04342588  |
| D44 | -179.32890774 |
| D45 | -58.57105539  |
| D46 | 61.47542735   |
| D47 | -174.76314937 |
| D48 | -54.94922835  |
| D49 | 66.01244584   |
| D50 | 38.94191091   |
| D51 | 165.53072946  |
| D52 | -74.03806408  |
| D53 | 50.29093456   |
| D54 | -128.88413490 |
| D55 | -3.12669742   |
| D56 | 104.71787830  |
| D57 | -178.96739451 |
| D58 | 178.63791359  |
| D59 | -62.29353767  |
| D60 | 59.85117202   |
| D61 | -173.91144394 |
| D62 | -54.48118019  |
| D63 | 67.12980908   |
| D64 | -171.68959837 |
| D65 | -52.75512161  |
| D66 | 68.90563757   |
| D67 | -100.69848489 |
| D68 | 178.50769283  |
| D69 | -172.01728931 |
| D70 | -52.81730917  |
| D71 | 68.70504397   |
| D72 | -176.10834355 |
| D73 | -57.23879992  |
| D74 | 65.42959578   |
| D75 | 174.98501894  |

|     |               |
|-----|---------------|
| D76 | -65.10123806  |
| D77 | 55.64059602   |
| D78 | -160.60254741 |
| D79 | -169.24528875 |
| D80 | -39.29214628  |
| D81 | 78.46480034   |
| D82 | -48.05669854  |
| D83 | 69.88760025   |
| D84 | -179.21300500 |
| D85 | -59.60021163  |
| D86 | 61.00485945   |
| D87 | -178.89555241 |
| D88 | -59.17639101  |
| D89 | 61.38100631   |

### Alkoxyamine 4

#### $^1\text{H}$ NMR

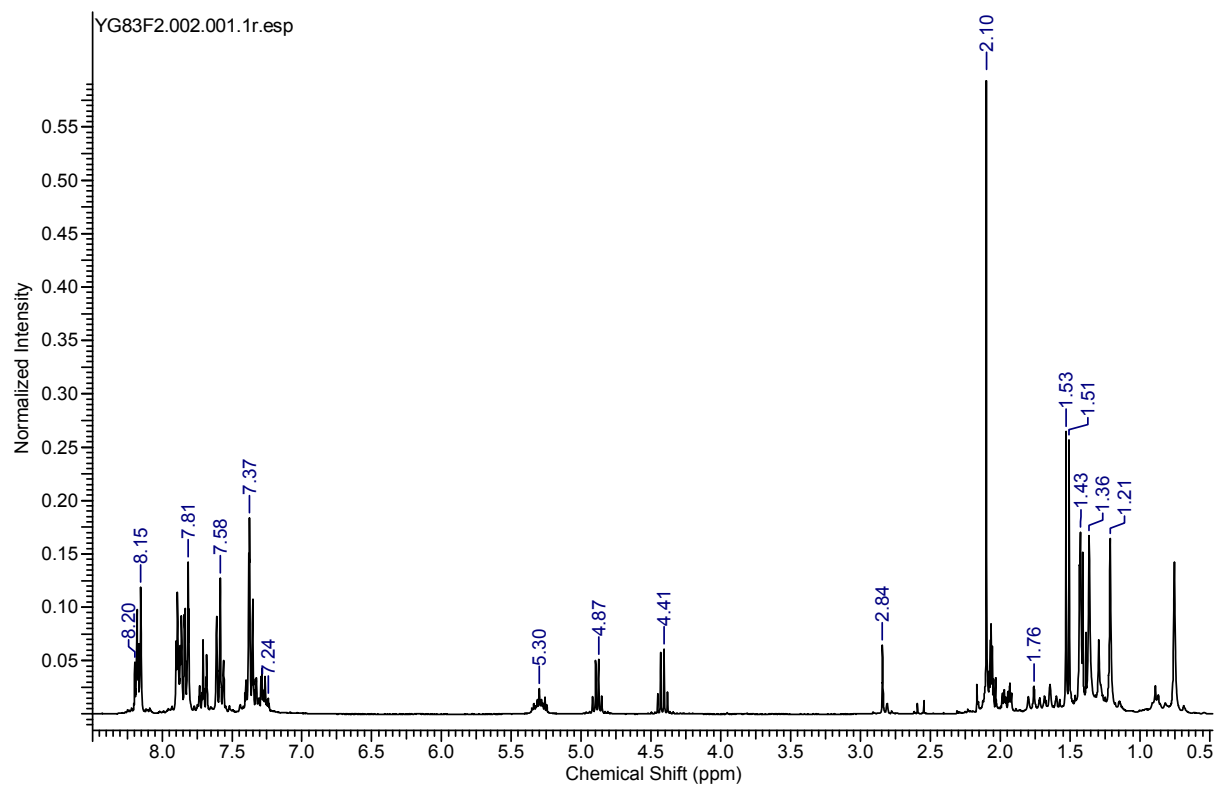

#### $^{13}\text{C}$ NMR

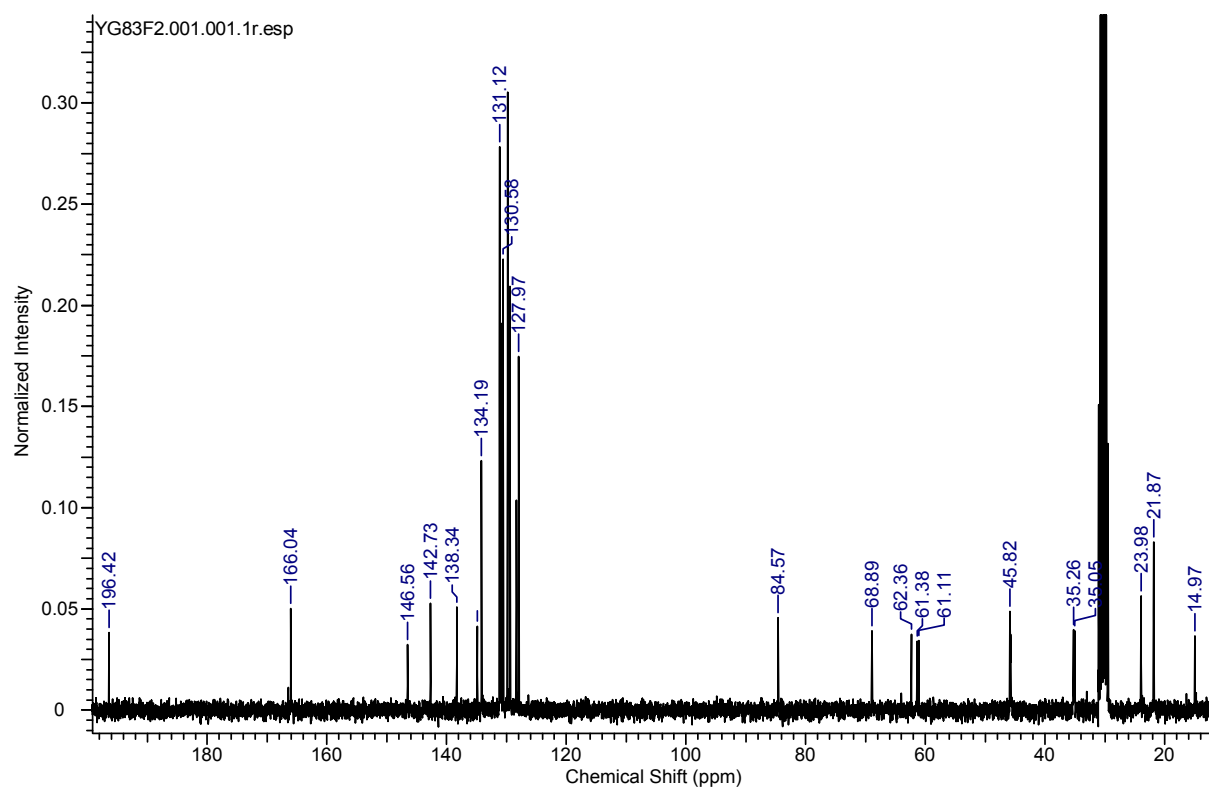

<sup>13</sup>C DEPT NMR

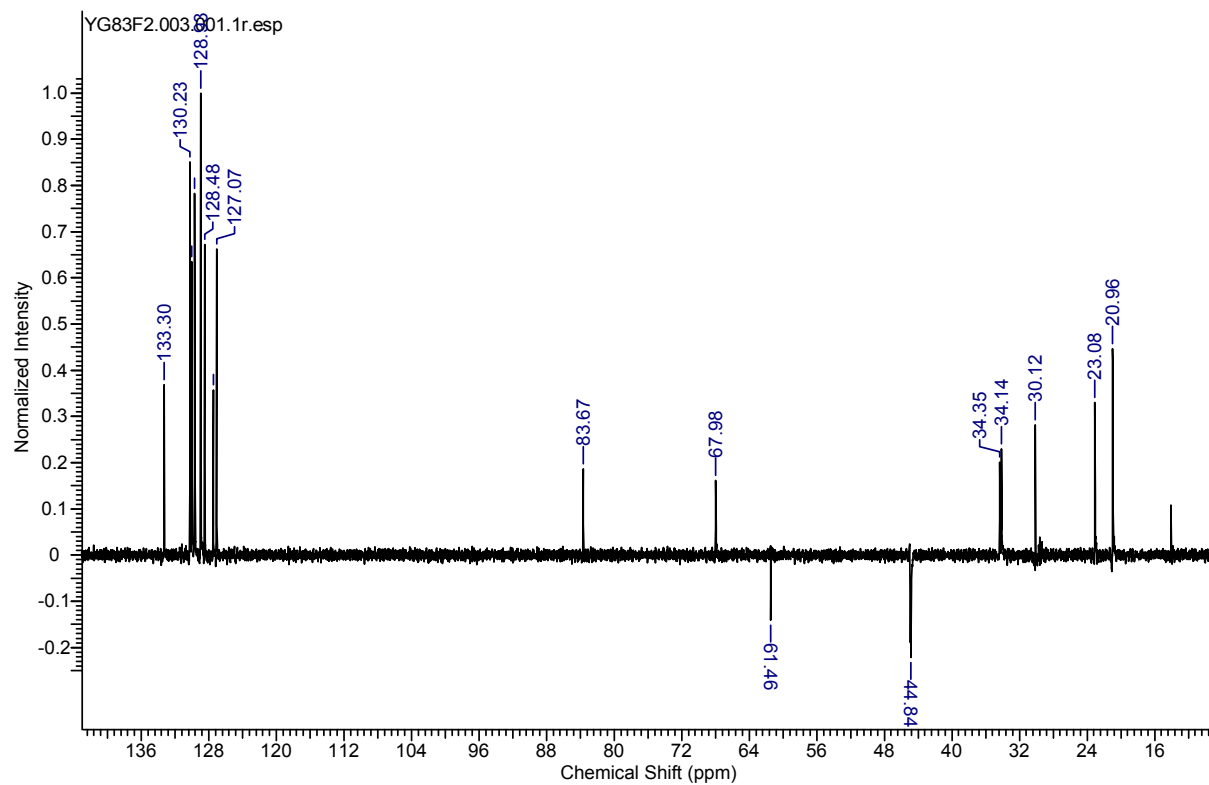

### Alkoxyamine 5

#### $^1\text{H}$ NMR

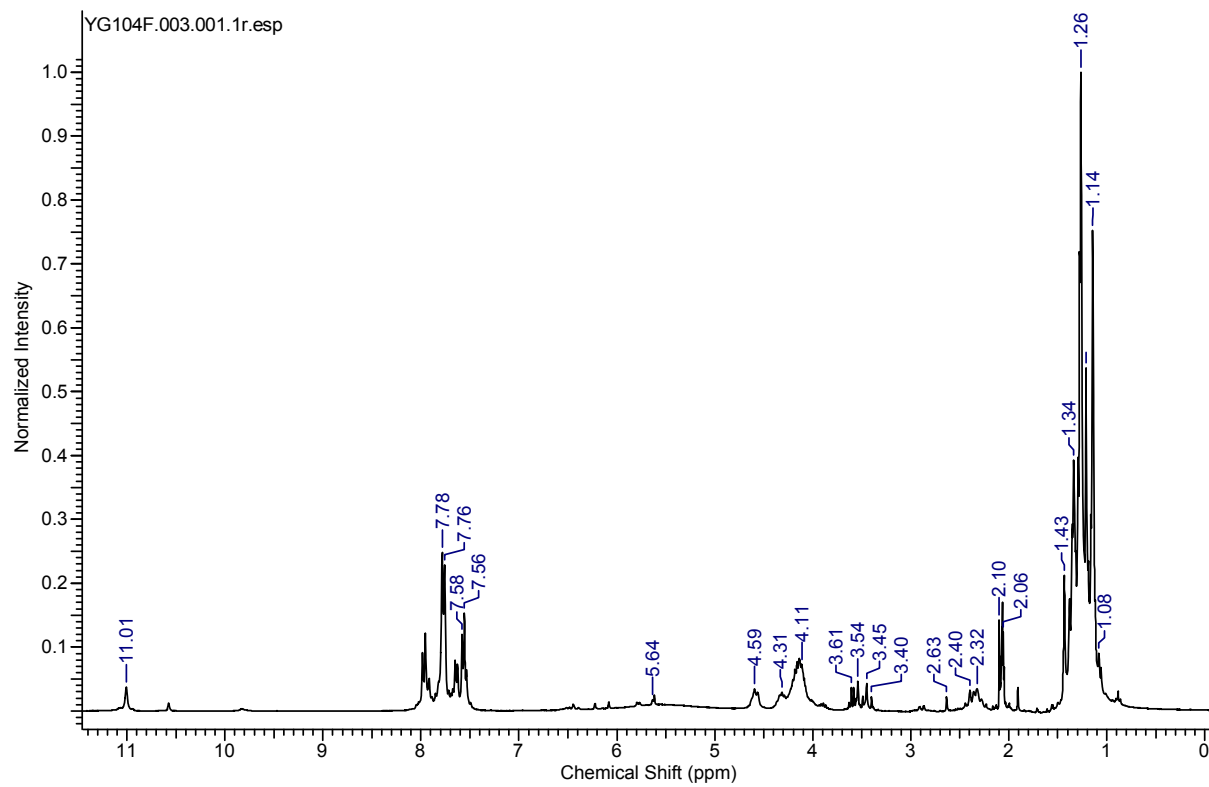

#### $^{31}\text{P}$ NMR



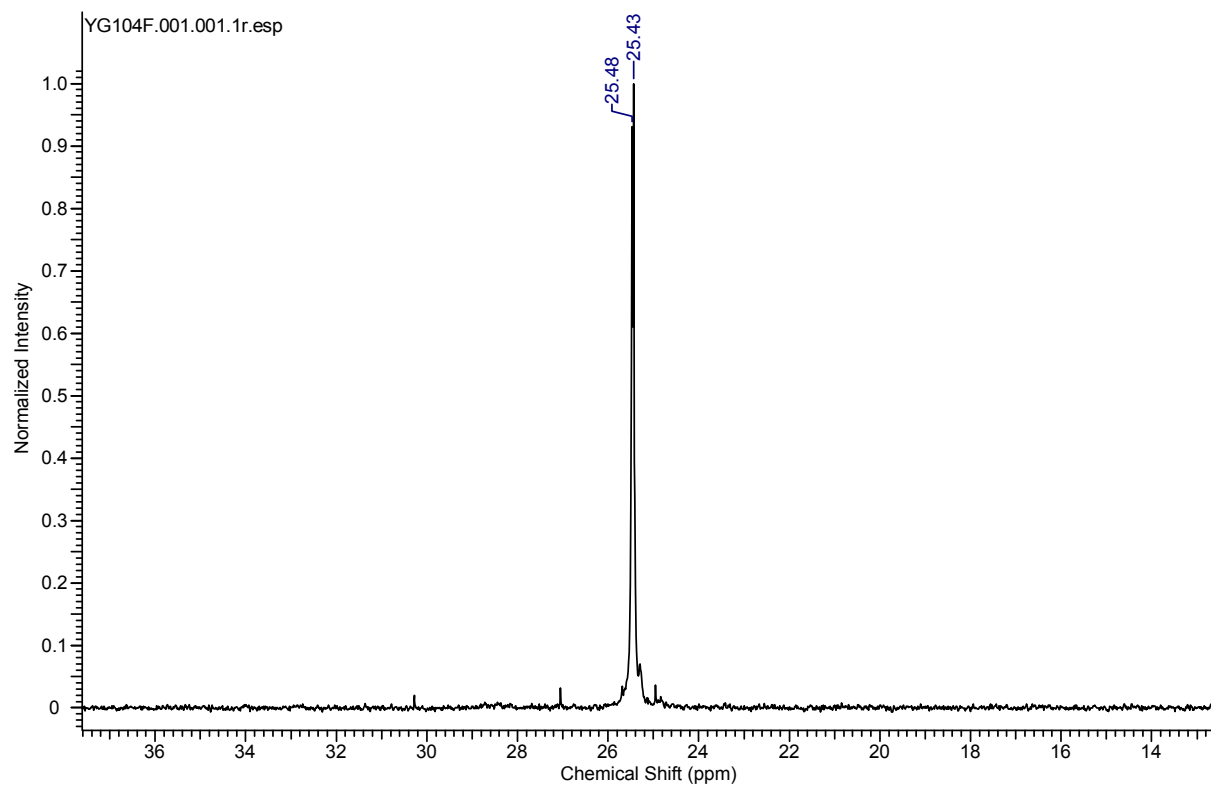

### Alkoxyamine 6

#### $^1\text{H}$ NMR

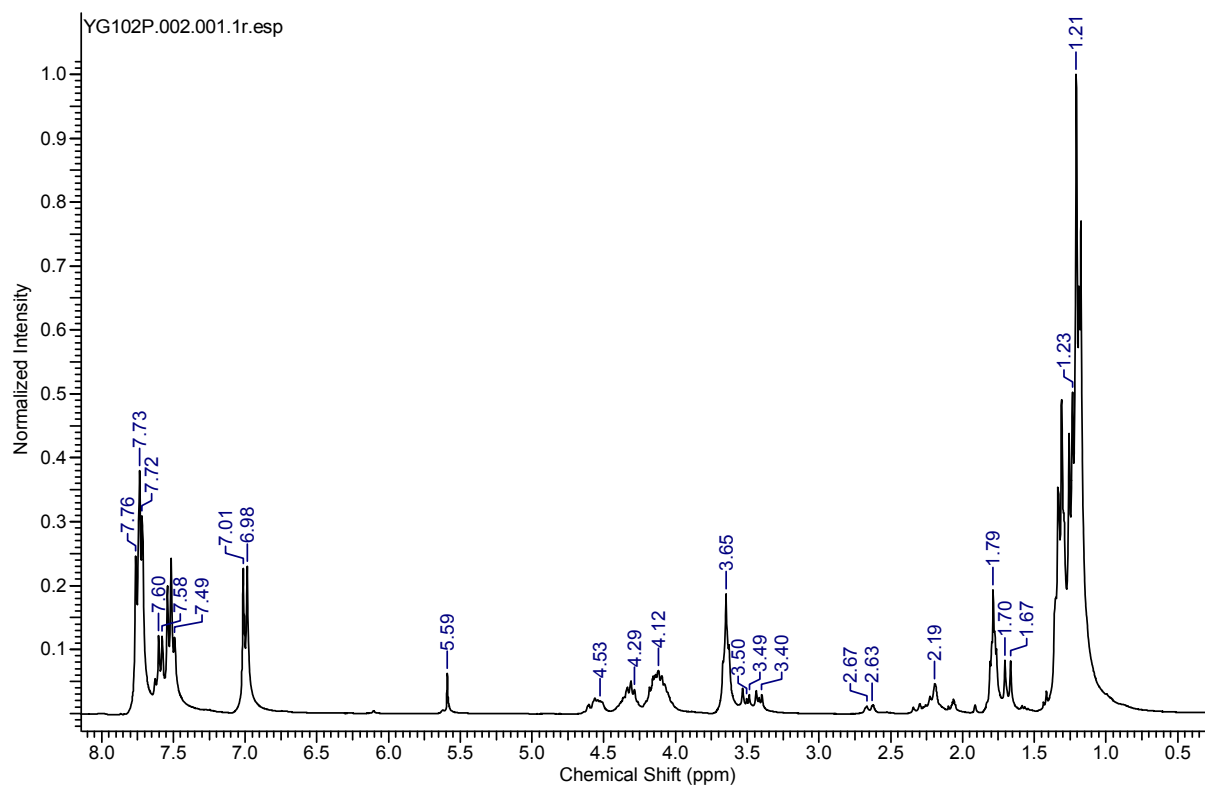

#### $^{31}\text{P}$ NMR

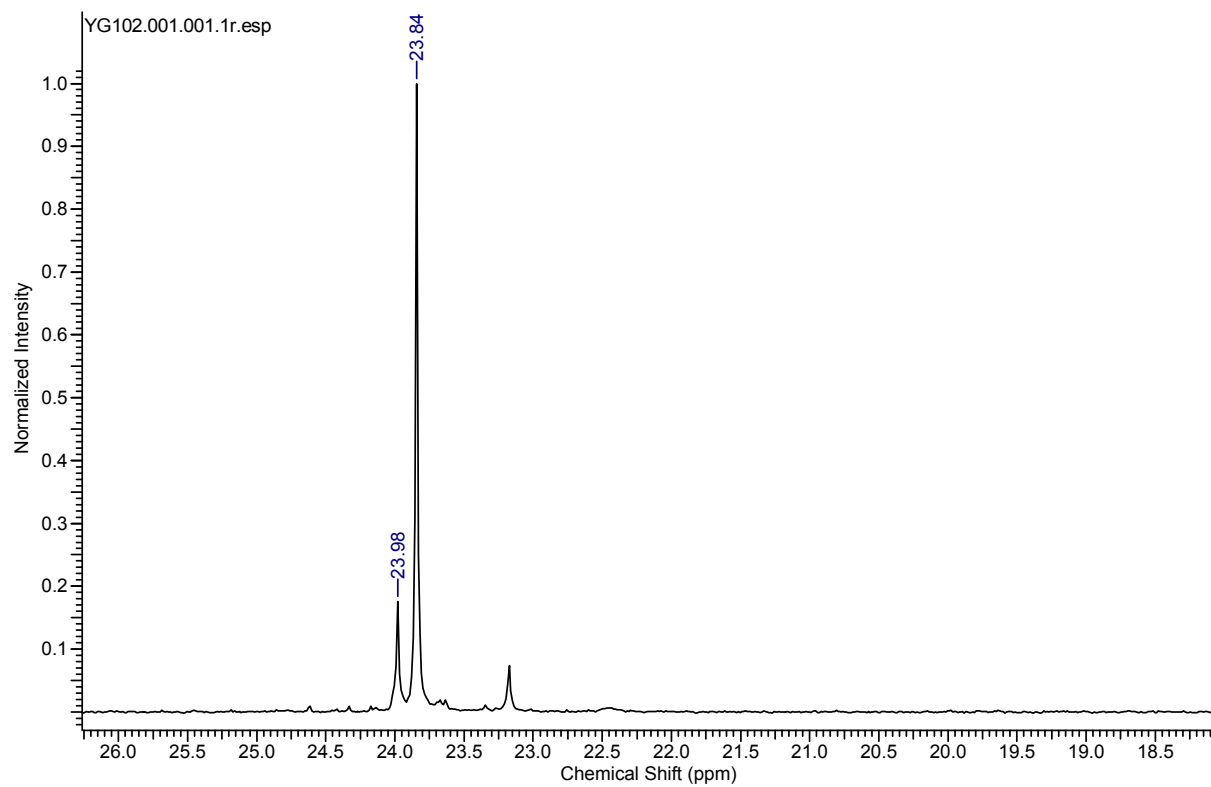

Supplement: c0ob01207f.pdf [file c0ob01207f.pdf]
